# Supplementary material for: CRISPR-Cas9 corrects Duchenne muscular dystrophy exon 44 deletion mutations in mice and human cells
Source: PubMed Central journal article supplement — Sci Adv. 2019 Mar 6;5(3):eaav4324. doi: 10.1126/sciadv.aav4324 (PMC6402849; doi:10.1126/sciadv.aav4324), 2019-03-06
Supplement: aav4324_SM.pdf [file aav4324_SM.pdf]

## Supplementary Materials for

# CRISPR-Cas9 corrects Duchenne muscular dystrophy exon 44 deletion mutations in mice and human cells

Yi-Li Min, Hui Li, Cristina Rodriguez-Caycedo, Alex A. Mireault, Jian Huang, John M. Shelton, John R. McAnally, Leonela Amoasii, Pradeep P. A. Mammen, Rhonda Bassel-Duby, Eric N. Olson\*

\*Corresponding author. Email: eric.olson@utsouthwestern.edu

Published 6 March 2019, *Sci. Adv.* **5**, eaav4324 (2019)  
DOI: 10.1126/sciadv.aav4324

### This PDF file includes:

- Fig. S1. Analysis of sgRNAs that target the splice acceptor or donor sites for exons 43 and 45.
- Fig. S2. Characterization of the  $\Delta$ Ex44 mouse line.
- Fig. S3. Intramuscular AAV9 delivery of gene editing components rescues dystrophin expression.
- Fig. S4. Analysis of top 10 potential off-target sites.
- Fig. S5. Correction of  $\Delta$ Ex44 mice by systemic delivery of AAV9 expressing gene editing components.
- Fig. S6. Western blot analysis of corrected  $\Delta$ Ex44 mice by systemic delivery of AAV9 expressing gene editing components.
- Fig. S7. Histology of  $\Delta$ Ex44 mice after systemic delivery of AAV9 expressing gene editing components.
- Fig. S8. Quantification of histological improvement and qPCR analysis of corrected  $\Delta$ Ex44 DMD mice.
- Fig. S9. Histological analysis showing dystrophin restoration in the EDL muscle of corrected  $\Delta$ Ex44 DMD mice.
- Table S1. Primer sequences and media components.

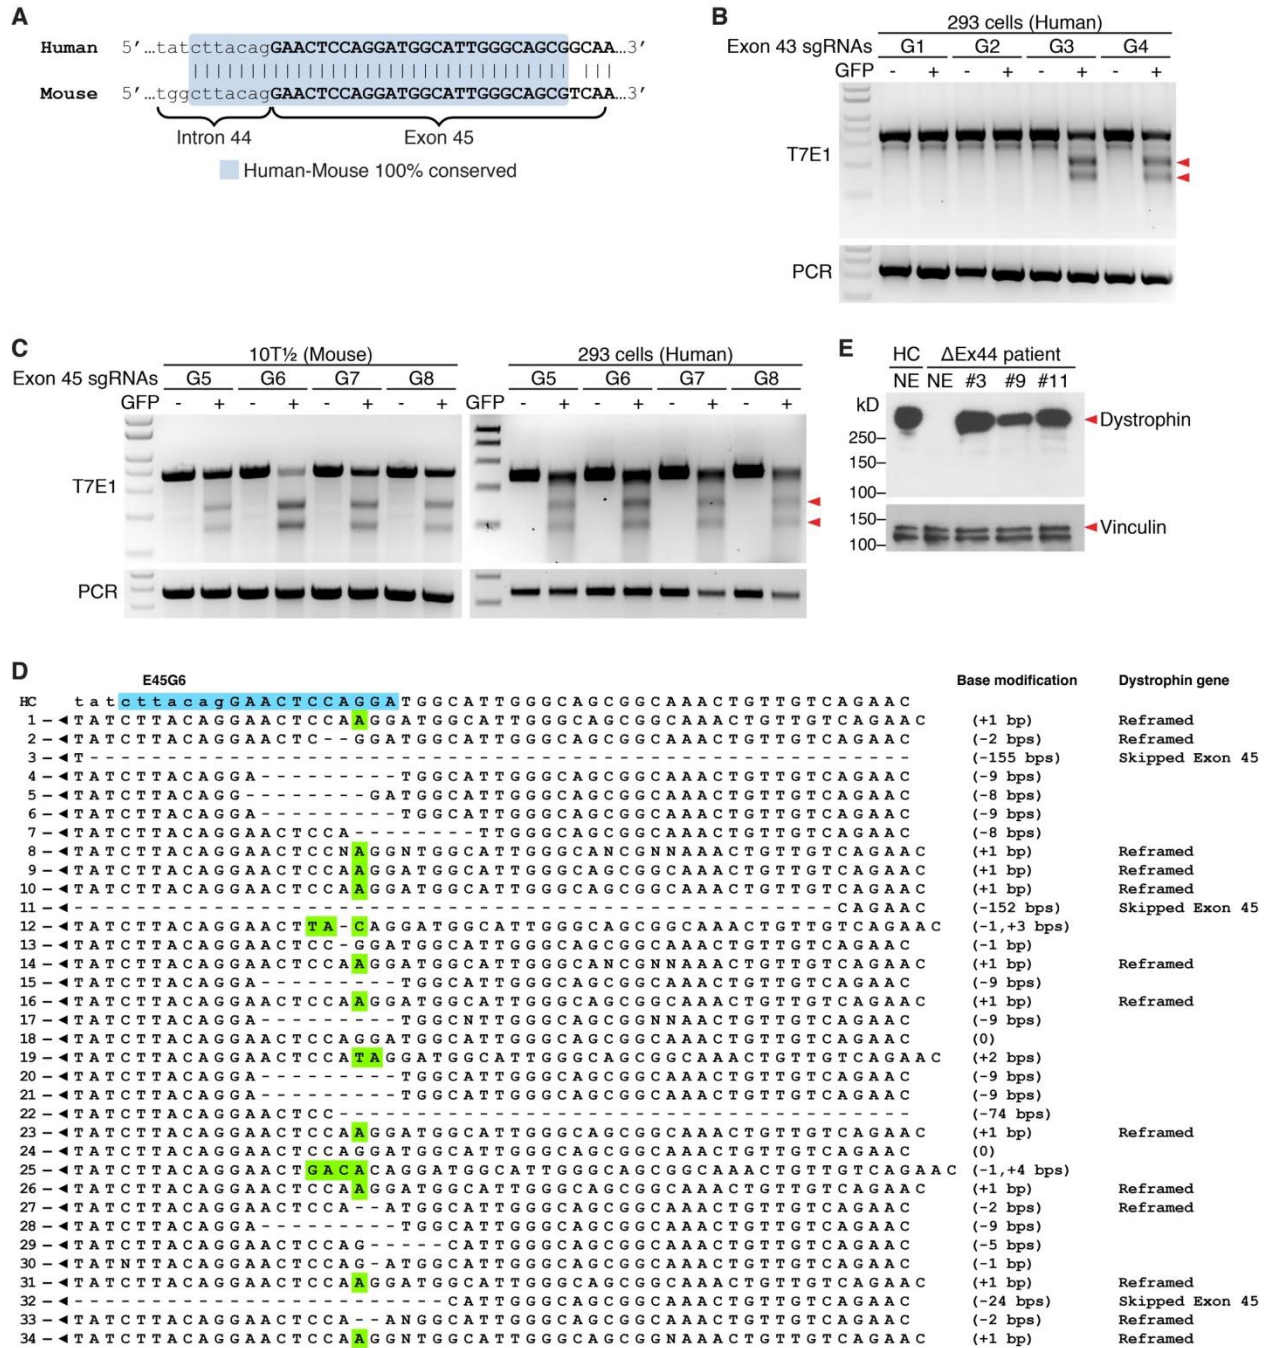

**Fig. S1. Analysis of sgRNAs that target the splice acceptor or donor sites for exons 43 and 45.** (A) Alignment of human and mouse DNA sequence at the intron-exon junction of exon 45. The conserved region is shaded in light blue. Exon sequence is in bold upper case and intron sequence is in lower case. (B) T7E1 assay using human 293 cells transfected with plasmids that express *SpCas9* and exon 43 sgRNA1 (G1), sgRNA2 (G2), sgRNA3 (G3) or sgRNA4 (G4) shows cleavage of the *DMD* locus at the intron-exon junctions of exon 43. Red arrowheads

denote cleavage products. PCR indicates the undigested PCR product. **(C)** T7E1 assay using mouse 10T½ and human 293 cells transfected with plasmids that express *SpCas9* and exon 45 sgRNA5 (G5), sgRNA6 (G6), sgRNA7 (G7) or sgRNA8 (G8) shows cleavage of the *Dmd* locus at the intron-exon junction of exon 45. Red arrowheads denote cleavage products. PCR indicates the undigested PCR product. **(D)** Sequences of the G6 edited 34 single clones. HC is the sequence of the healthy human control. G6 sequence is shaded in blue. Insertions are shaded in green. Base modification and dystrophin gene status are listed on the right. **(E)** Western blot analysis showing restoration of dystrophin expression in three corrected single iPSC clones (clones #3, #9 and #11). Clone #3 and #11 were corrected through exon 45 skipping, and clone #9 was corrected through exon 45 reframing. HC, iPSC-CM from a healthy human control. NE, non-edited. Vinculin is loading control.

**A**

```

cagcaatcaggctgaggggggagacagtaga tattataattagtacaaaaaggacattgaaaattgtcttcctgagtcctaggaattatgg
tcactgaacctcaatgatagaagttgtatttacatattgatgactgacataa aagaattgggtagactagaagagaacatgagctgtgg
gaaggagcaagctgggttagaacaaggctctgtcagagtcagcatgggaatgaggtagttgttagaggcaattctgcaagcagggtggat
attagtatcttaactgtagttctgaaatcaggaggaaggttgaaactcataaaactgataagacaattttattttgatctgcatgtat
aaagttgaacataatgattctcaaataatttttaaatttaacatgttttaaaatataaaaattactttttaaattatcacaagggagaa
gatgctaattatcctaagtaattgtctagtactcattttaaacaatgtatattgtttaaattttaaaggaaataatacattttgttttaatta
acattctgtataacgtagatattataatctgatagttgaaaatgaaatctacaaatgtaagatactacaaaagtaatacctttgtcagaaa
aaaaaagaatgggtgatgtccacaaaatgtgtcctataaaccacttaccttatttcatccatgttttcaaattatagGCGATTGACAGAT
CAGTTGAAAAATGGCGACACTTTCATTATGATATGAAGGTATTTAATCAATGGCTGAATGAAGTTGAACAGTTTTTCAAAAAGACACAAAA
TCCTGAAAAC TGGGAACATGCTAAATACAAATGGTATCTTAAGgtaagactttgagattccctttccatgctggcttcatttttcagca
atattttacataatttactactgtaaagtccaactaaaaggatgaaatggaatatataattcctgactttattgttgctcactgaacatgta
taaaaatcataacaagtgctgctgaaaatgtgtctatgactgtttgtgaaaggatgagagcatctccctgggactatggttcatctga
tgaattgtgaagtgctcactgcatctgggatgcaggaaatcatcttatagcaggaaatagtggttttaggtctctccccgcctctgtgta
tgtgtgtgtgtgtttcccttatgttggaaaccagttccagaaggagaagctgtggtatacttagtagtaatgtagttccttcaaatatcca
tcatgttaaaattacaagtttctttctcacaagacaattttgtggtgatataagtaaatatttctgtacatcctattgacaaaatgccttctga
gacagactagagg

```

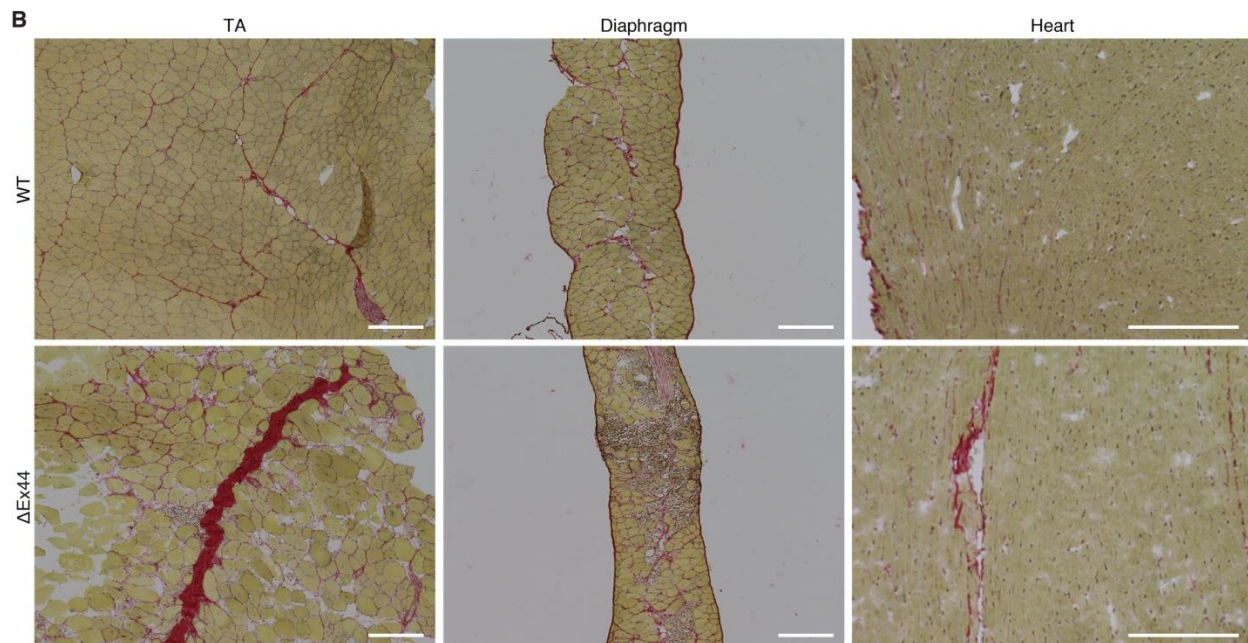

**Fig. S2. Characterization of the  $\Delta$ Ex44 mouse line. (A)** Genomic sequence of targeted locus of *Dmd* exon 44 and surrounding intron regions. sgRNA sequences are indicated in blue, protospacer adjacent motifs (PAMs) are indicated in red, and genotyping primers are highlighted in yellow. Exon 44 sequence is in bold upper case and intron sequence is in lower case. **(B)** Picrosirius red staining of TA, diaphragm, and heart of WT and  $\Delta$ Ex44 mice. Scale bar is 50  $\mu$ m.



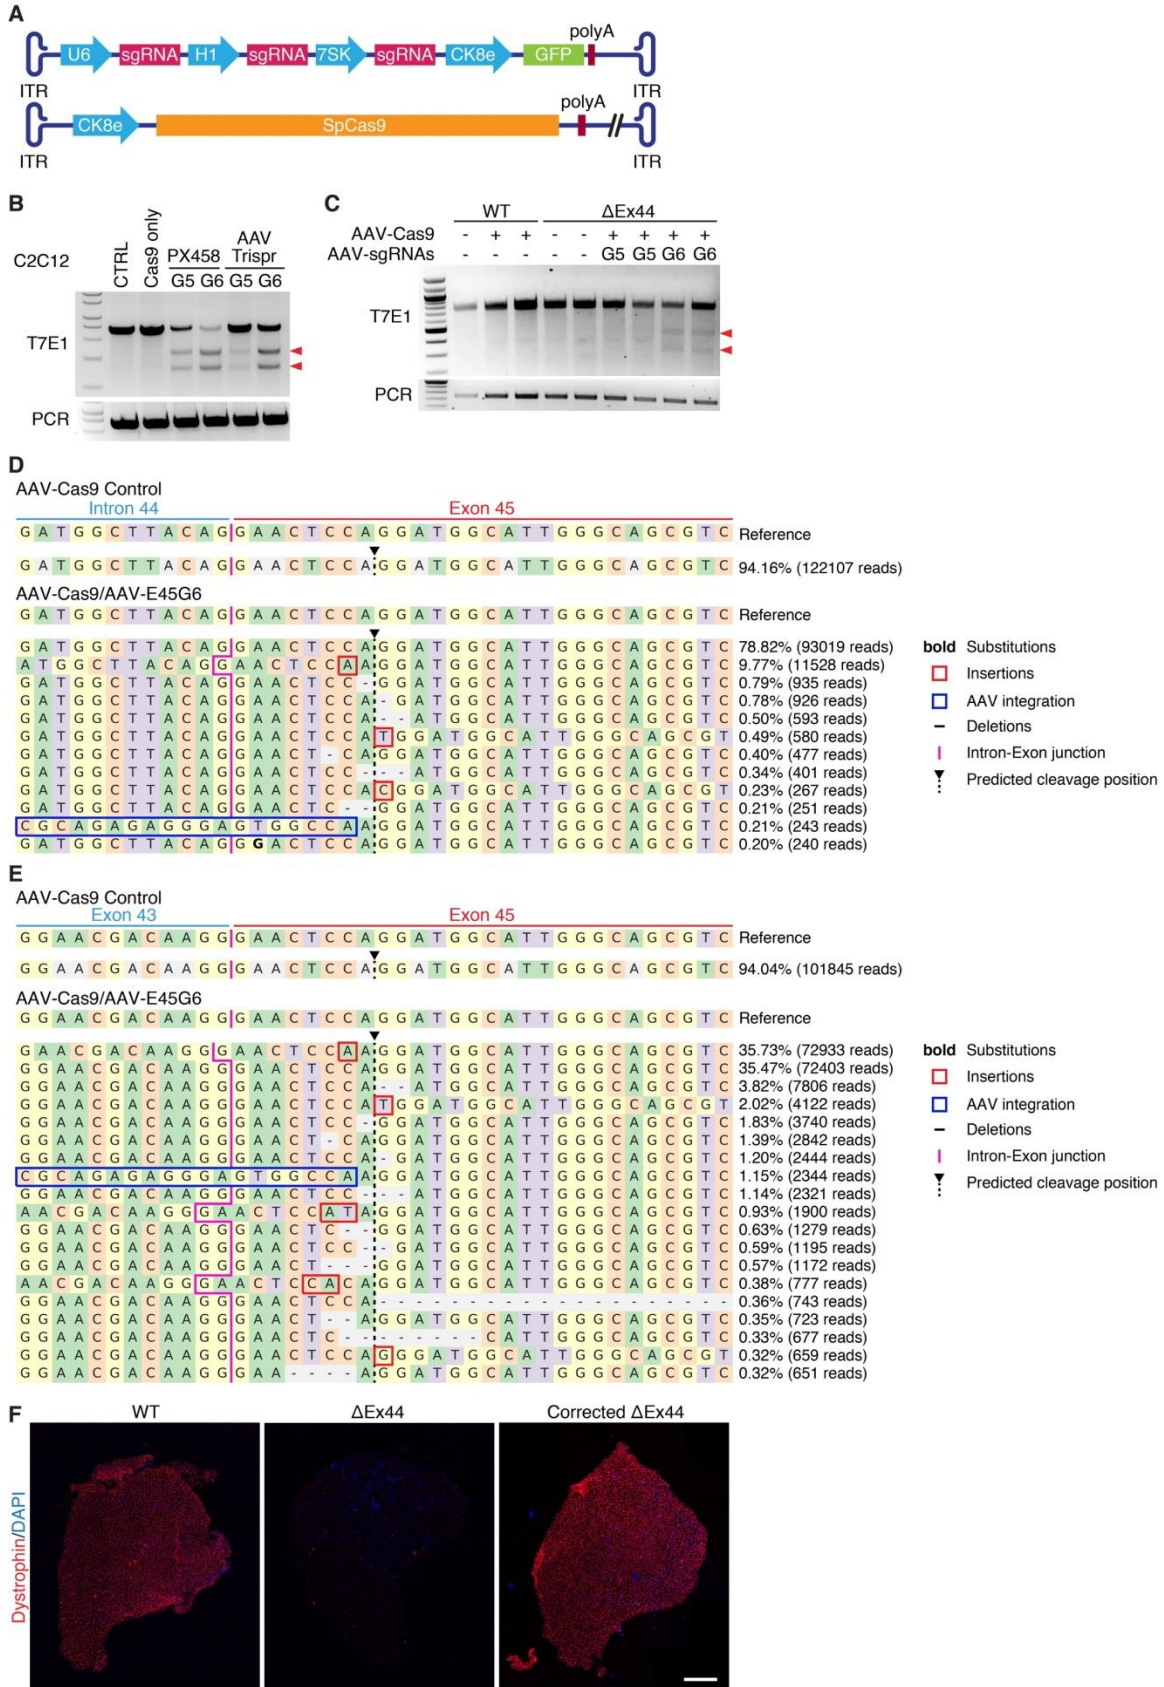

**Fig. S3. Intramuscular AAV9 delivery of gene editing components rescues dystrophin expression.** (A) Illustration of the AAV construct for CRISPR/Cas9 delivery. The muscle creatine kinase 8 (CK8e) regulatory cassette was used to express *SpCas9* and GFP. The U6, H1, and 7SK RNA polymerase III promoters were used to express sgRNAs. ITR is inverted terminal repeats. (B) T7E1 assay shows cleavage of the *Dmd* locus at the intron-exon junction of exon 45 in mouse C2C12 cells with electroporation of G5 or G6 in PX458 or Trispr backbone. Red arrowheads show cleavage products of genome editing. PCR indicates the undigested PCR product. (C) T7E1 assay shows cleavage of the *Dmd* locus at the intron-exon junction of exon 45 in TA muscle of corrected  $\Delta$ Ex44 mice. Red arrowheads show cleavage products of genome editing. PCR indicates the undigested PCR product. (D and E) On-target (D) genomic and (E) cDNA amplicon deep sequencing of  $\Delta$ Ex44 DMD, and corrected  $\Delta$ Ex44 DMD mice after 3 weeks of AAV-Cas9 and AAV-G6 intramuscular injection ( $2.5 \times 10^{10}$  vg of AAV9-Cas9 and  $2.5 \times 10^{10}$  vg of AAV-G6). Bold represents substitutions, red square is insertions, “-“ is deletion. Vertical pink line indicates intron-exon junction in (D) and exon-exon junction in (E). Black arrowhead points to dotted vertical line representing the predicted cleavage site. (F) Dystrophin immunostaining of TA muscle in WT,  $\Delta$ Ex44 DMD, and corrected  $\Delta$ Ex44 DMD mice after 3 weeks of AAV-Cas9 and AAV-G6 intramuscular injection ( $2.5 \times 10^{10}$  vg of AAV9-Cas9 and  $2.5 \times 10^{10}$  vg of AAV-G6). Dystrophin is shown in red. Nuclei are marked by DAPI stain in blue. 10X tile scan of the entire TA muscle. Scale bar is 500  $\mu$ m.

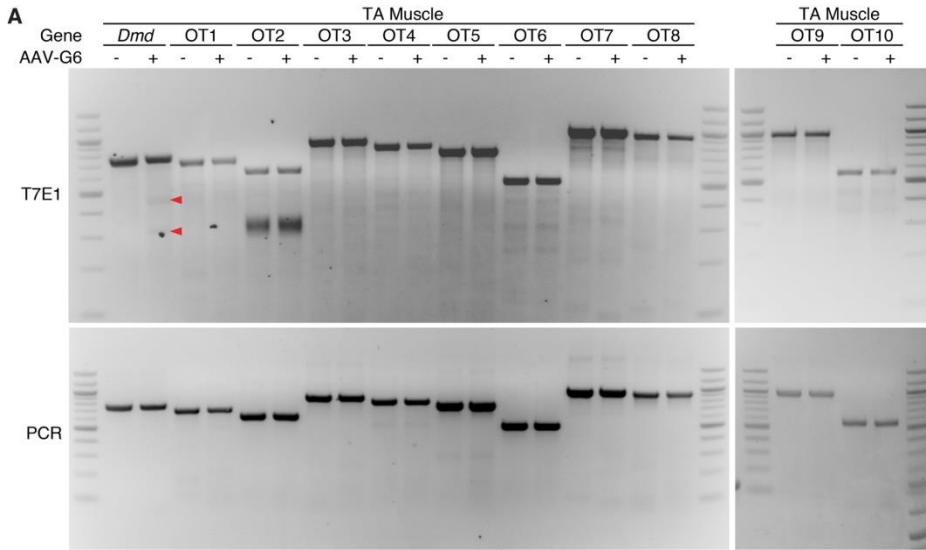

**B**

| Selected OT site | Sequence           | PAM | Gene               | Chromosome | Samples                  |                          | Total Reads | Unmodified | NHEJ  | NHEJ%  | AVG    |
|------------------|--------------------|-----|--------------------|------------|--------------------------|--------------------------|-------------|------------|-------|--------|--------|
|                  |                    |     |                    |            | Δ44-AAV-Cas9 control-1   | Δ44-AAV-Cas9 control-2   |             |            |       |        |        |
| E45G6 On-target  | CTTACAGGAACTCCAGGA | TGG | ENSMUSG00000045103 | chrX       | Δ44-AAV-Cas9 control-1   | Δ44-AAV-Cas9 control-2   | 129677      | 129273     | 404   | 0.31%  | 14.89% |
|                  |                    |     |                    |            | Δ44-AAV-Cas9 AAV-E45G6-1 | Δ44-AAV-Cas9 AAV-E45G6-2 | 118011      | 99440      | 18571 | 15.74% |        |
|                  |                    |     |                    |            | Δ44-AAV-Cas9 control-1   | Δ44-AAV-Cas9 control-2   | 79958       | 68732      | 11226 | 14.04% |        |
|                  |                    |     |                    |            | Δ44-AAV-Cas9 AAV-E45G6-1 | Δ44-AAV-Cas9 AAV-E45G6-2 | 148291      | 147900     | 391   | 0.26%  |        |
| E45G6 OT1        | CTCACAGAACTCCAGGA  | AAG | ENSMUSG00000018168 | chr11      | Δ44-AAV-Cas9 control-1   | Δ44-AAV-Cas9 control-2   | 140851      | 140391     | 460   | 0.33%  | 0.30%  |
|                  |                    |     |                    |            | Δ44-AAV-Cas9 AAV-E45G6-1 | Δ44-AAV-Cas9 AAV-E45G6-2 | 146193      | 145718     | 475   | 0.32%  |        |
|                  |                    |     |                    |            | Δ44-AAV-Cas9 control-1   | Δ44-AAV-Cas9 control-2   | 141836      | 141485     | 351   | 0.25%  |        |
|                  |                    |     |                    |            | Δ44-AAV-Cas9 AAV-E45G6-1 | Δ44-AAV-Cas9 AAV-E45G6-2 | 195414      | 195077     | 337   | 0.17%  |        |
| E45G6 OT2        | TTGACAGGAACTCCAGGA | AAG | ENSMUSG00000087615 | chr17      | Δ44-AAV-Cas9 control-1   | Δ44-AAV-Cas9 control-2   | 164408      | 164011     | 397   | 0.24%  | 0.22%  |
|                  |                    |     |                    |            | Δ44-AAV-Cas9 AAV-E45G6-1 | Δ44-AAV-Cas9 AAV-E45G6-2 | 163644      | 163237     | 407   | 0.25%  |        |
|                  |                    |     |                    |            | Δ44-AAV-Cas9 control-1   | Δ44-AAV-Cas9 control-2   | 224318      | 223898     | 420   | 0.19%  |        |
|                  |                    |     |                    |            | Δ44-AAV-Cas9 AAV-E45G6-1 | Δ44-AAV-Cas9 AAV-E45G6-2 | 118944      | 118753     | 191   | 0.16%  |        |
| E45G6 OT3        | CTTCCAGGAACTCCAGCA | CAG | ENSMUSG00000024087 | chr17      | Δ44-AAV-Cas9 control-1   | Δ44-AAV-Cas9 control-2   | 137789      | 137573     | 216   | 0.16%  | 0.16%  |
|                  |                    |     |                    |            | Δ44-AAV-Cas9 AAV-E45G6-1 | Δ44-AAV-Cas9 AAV-E45G6-2 | 115015      | 114797     | 218   | 0.19%  |        |
|                  |                    |     |                    |            | Δ44-AAV-Cas9 control-1   | Δ44-AAV-Cas9 control-2   | 115647      | 115493     | 154   | 0.13%  |        |
|                  |                    |     |                    |            | Δ44-AAV-Cas9 AAV-E45G6-1 | Δ44-AAV-Cas9 AAV-E45G6-2 | 112923      | 112346     | 577   | 0.51%  |        |
| E45G6 OT4        | CTTATAGGAATTCAGGA  | AGG | ENSMUSG00000001123 | chr11      | Δ44-AAV-Cas9 control-1   | Δ44-AAV-Cas9 control-2   | 80286       | 79896      | 390   | 0.49%  | 0.50%  |
|                  |                    |     |                    |            | Δ44-AAV-Cas9 AAV-E45G6-1 | Δ44-AAV-Cas9 AAV-E45G6-2 | 72867       | 72514      | 353   | 0.48%  |        |
|                  |                    |     |                    |            | Δ44-AAV-Cas9 control-1   | Δ44-AAV-Cas9 control-2   | 102712      | 102102     | 610   | 0.59%  |        |
|                  |                    |     |                    |            | Δ44-AAV-Cas9 AAV-E45G6-1 | Δ44-AAV-Cas9 AAV-E45G6-2 | 132220      | 132032     | 188   | 0.14%  |        |
| E45G6 OT5        | GTGACATGAACTCCAGGA | AAG | ENSMUSG00000097736 | chr9       | Δ44-AAV-Cas9 control-1   | Δ44-AAV-Cas9 control-2   | 100491      | 100341     | 150   | 0.15%  | 0.16%  |
|                  |                    |     |                    |            | Δ44-AAV-Cas9 AAV-E45G6-1 | Δ44-AAV-Cas9 AAV-E45G6-2 | 111366      | 111173     | 193   | 0.17%  |        |
|                  |                    |     |                    |            | Δ44-AAV-Cas9 control-1   | Δ44-AAV-Cas9 control-2   | 95824       | 95395      | 429   | 0.45%  |        |
|                  |                    |     |                    |            | Δ44-AAV-Cas9 AAV-E45G6-1 | Δ44-AAV-Cas9 AAV-E45G6-2 | 103709      | 103292     | 417   | 0.40%  |        |
| E45G6 OT6        | TTTCCAGGAATTCAGGA  | AGG | ENSMUSG00000026835 | chr2       | Δ44-AAV-Cas9 control-1   | Δ44-AAV-Cas9 control-2   | 112059      | 111548     | 511   | 0.46%  | 0.47%  |
|                  |                    |     |                    |            | Δ44-AAV-Cas9 AAV-E45G6-1 | Δ44-AAV-Cas9 AAV-E45G6-2 | 128665      | 128037     | 628   | 0.49%  |        |
|                  |                    |     |                    |            | Δ44-AAV-Cas9 control-1   | Δ44-AAV-Cas9 control-2   | 131416      | 130646     | 770   | 0.59%  |        |
|                  |                    |     |                    |            | Δ44-AAV-Cas9 AAV-E45G6-1 | Δ44-AAV-Cas9 AAV-E45G6-2 | 122440      | 121656     | 784   | 0.64%  |        |
| E45G6 OT7        | CTCACCGGAACTCCAGGA | GGG | ENSMUSG00000025650 | chr9       | Δ44-AAV-Cas9 control-1   | Δ44-AAV-Cas9 control-2   | 122052      | 121559     | 493   | 0.40%  | 0.47%  |
|                  |                    |     |                    |            | Δ44-AAV-Cas9 AAV-E45G6-1 | Δ44-AAV-Cas9 AAV-E45G6-2 | 134661      | 133948     | 713   | 0.53%  |        |
|                  |                    |     |                    |            | Δ44-AAV-Cas9 control-1   | Δ44-AAV-Cas9 control-2   | 87995       | 86485      | 1510  | 1.72%  |        |
|                  |                    |     |                    |            | Δ44-AAV-Cas9 AAV-E45G6-1 | Δ44-AAV-Cas9 AAV-E45G6-2 | 130159      | 128107     | 2052  | 1.58%  |        |
| E45G6 OT8        | ATGACAGAACTCCAGGA  | AAG | ENSMUSG00000056952 | chr6       | Δ44-AAV-Cas9 control-1   | Δ44-AAV-Cas9 control-2   | 136626      | 134574     | 2052  | 1.50%  | 1.48%  |
|                  |                    |     |                    |            | Δ44-AAV-Cas9 AAV-E45G6-1 | Δ44-AAV-Cas9 AAV-E45G6-2 | 121227      | 119468     | 1759  | 1.45%  |        |
|                  |                    |     |                    |            | Δ44-AAV-Cas9 control-1   | Δ44-AAV-Cas9 control-2   | 123165      | 122861     | 304   | 0.25%  |        |
|                  |                    |     |                    |            | Δ44-AAV-Cas9 AAV-E45G6-1 | Δ44-AAV-Cas9 AAV-E45G6-2 | 116857      | 115745     | 1112  | 0.95%  |        |
| E45G6 OT9        | CTACCAGGAACTCCAGGC | TGG | ENSMUSG00000021275 | chr12      | Δ44-AAV-Cas9 control-1   | Δ44-AAV-Cas9 control-2   | 135673      | 135192     | 481   | 0.35%  | 0.39%  |
|                  |                    |     |                    |            | Δ44-AAV-Cas9 AAV-E45G6-1 | Δ44-AAV-Cas9 AAV-E45G6-2 | 134603      | 134030     | 573   | 0.43%  |        |
|                  |                    |     |                    |            | Δ44-AAV-Cas9 control-1   | Δ44-AAV-Cas9 control-2   | 89824       | 89681      | 143   | 0.16%  |        |
|                  |                    |     |                    |            | Δ44-AAV-Cas9 AAV-E45G6-1 | Δ44-AAV-Cas9 AAV-E45G6-2 | 94091       | 93884      | 207   | 0.22%  |        |
| E45G6 OT10       | CTTTCAGAGACTCCAGGA | CAG | ENSMUSG00000034731 | chr14      | Δ44-AAV-Cas9 control-1   | Δ44-AAV-Cas9 control-2   | 80995       | 80807      | 188   | 0.23%  | 0.22%  |
|                  |                    |     |                    |            | Δ44-AAV-Cas9 AAV-E45G6-1 | Δ44-AAV-Cas9 AAV-E45G6-2 | 100775      | 100570     | 205   | 0.20%  |        |

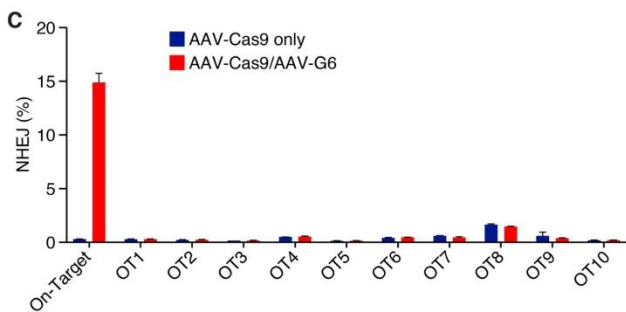

**Fig. S4. Analysis of top 10 potential off-target sites.** (A) T7E1 analysis of the top 10 predicted off-target (OT) sites of sgRNA-G6 assayed in TA muscle 3 weeks following intramuscular injection of  $2.5 \times 10^{10}$  vg AAV9-Cas9 and  $2.5 \times 10^{10}$  vg AAV-G6. Red arrowheads denote on-target cleavage products. No off-target cleavage products were detected. PCR indicates the undigested PCR product. (B) Amplicon genomic deep sequencing analysis on the top 10 predicted off-target sites of G6. Muscle was analyzed 3 weeks following intramuscular injection of  $2.5 \times 10^{10}$  vg AAV9-Cas9 and  $2.5 \times 10^{10}$  vg AAV-G6. Mismatches in the target sequence are highlighted in red. (C) Percentage of NHEJ in amplicon genomic deep sequencing analysis on the top 10 predicted off-target sites of G6. Blue indicates AAV-Cas9 only control, and red indicates AAV-Cas9/AAV-G6 injected TA muscle. Data are represented as mean  $\pm$  SEM.



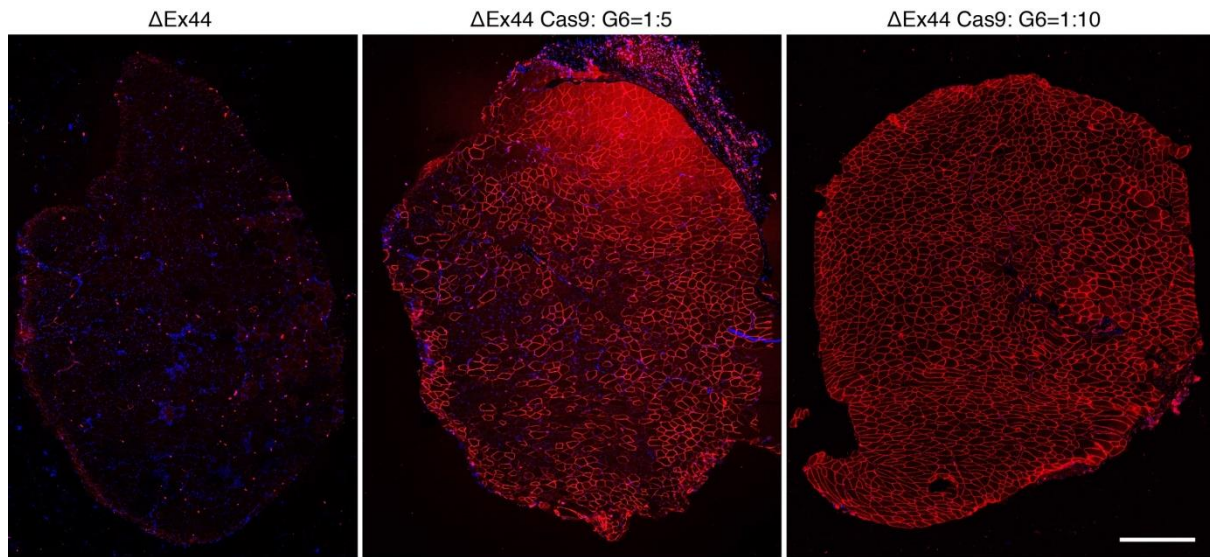

**Fig. S5. Correction of  $\Delta\text{Ex44}$  mice by systemic delivery of AAV9 expressing gene editing components.** Whole TA muscle scanning of  $\Delta\text{Ex44}$  DMD and corrected  $\Delta\text{Ex44}$  DMD 4 weeks after systemic injection of a 1:5 ratio and 1:10 ratio of AAV-Cas9 to AAV-G6. AAV-Cas9 was administered at  $5 \times 10^{13}$  vg/kg. Dystrophin is shown in red. Nuclei are marked by DAPI stain in blue. 10X tile scan of the entire TA muscle. Scale bar is 500  $\mu\text{m}$ .

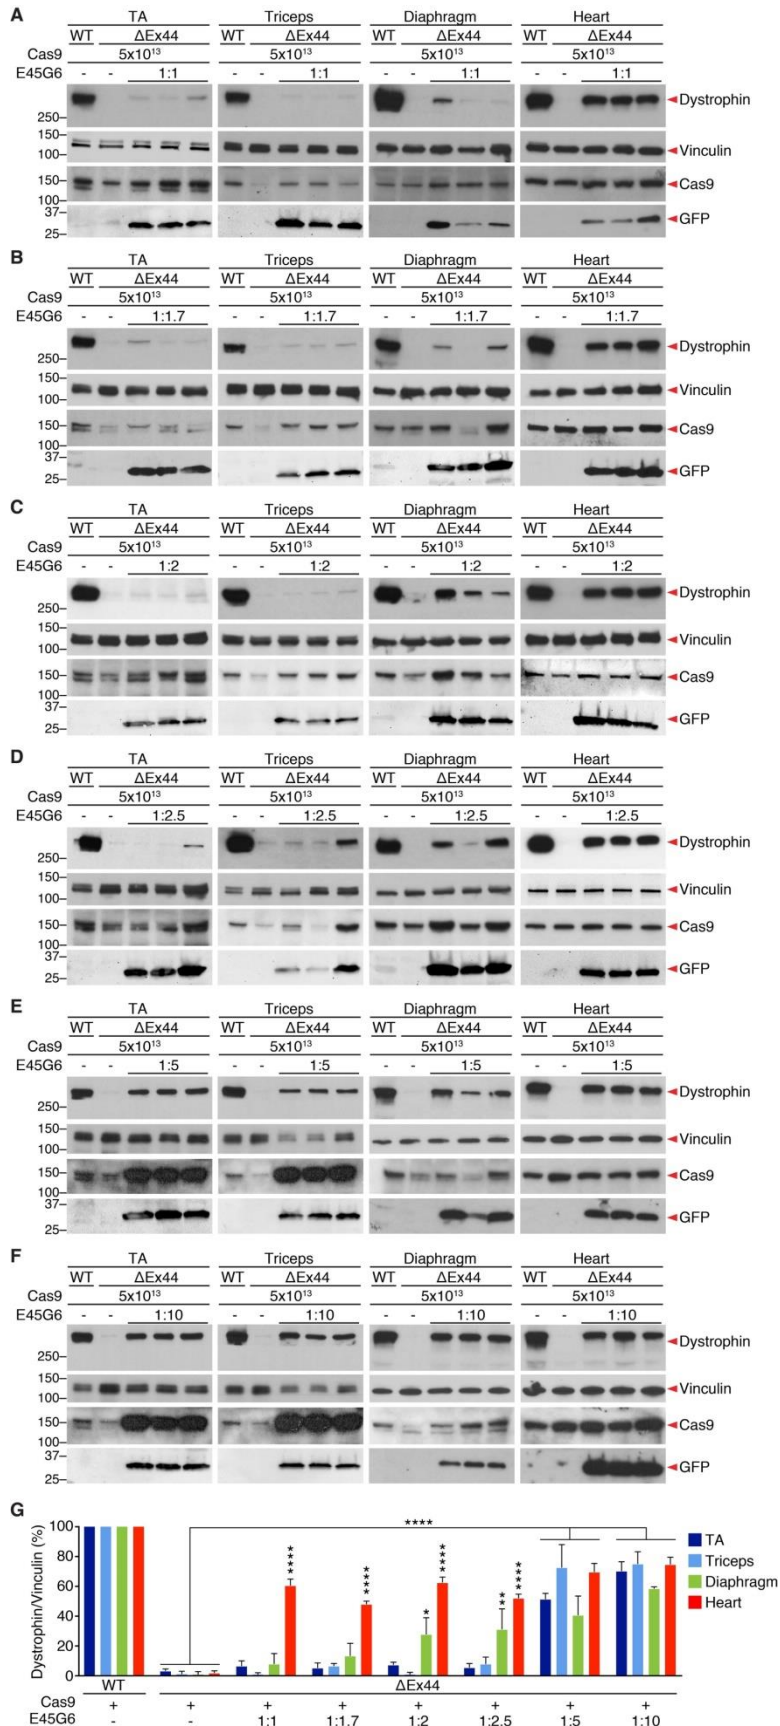

**Fig. S6. Western blot analysis of corrected  $\Delta$ Ex44 mice by systemic delivery of AAV9 expressing gene editing components.** (A)–(F) Western blot analysis of dystrophin, Cas9, and GFP protein expression in TA, triceps, diaphragm, and heart of  $\Delta$ Ex44 mice 4 weeks after systemic delivery of AAV-Cas9 and AAV-G6 at the indicated ratios. AAV-Cas9 was administered at  $5 \times 10^{13}$  vg/kg. Vinculin is loading control. (n= 3). (G) Quantification of the Western blot analysis in TA, triceps, diaphragm, and heart. Relative dystrophin intensity was calibrated with vinculin internal control. Data are represented as mean  $\pm$  SEM. One-way ANOVA was performed followed by Newman-Keuls post hoc test. \*P<0.005, \*\*P<0.001, \*\*\*\*P<0.0001 (n=3).



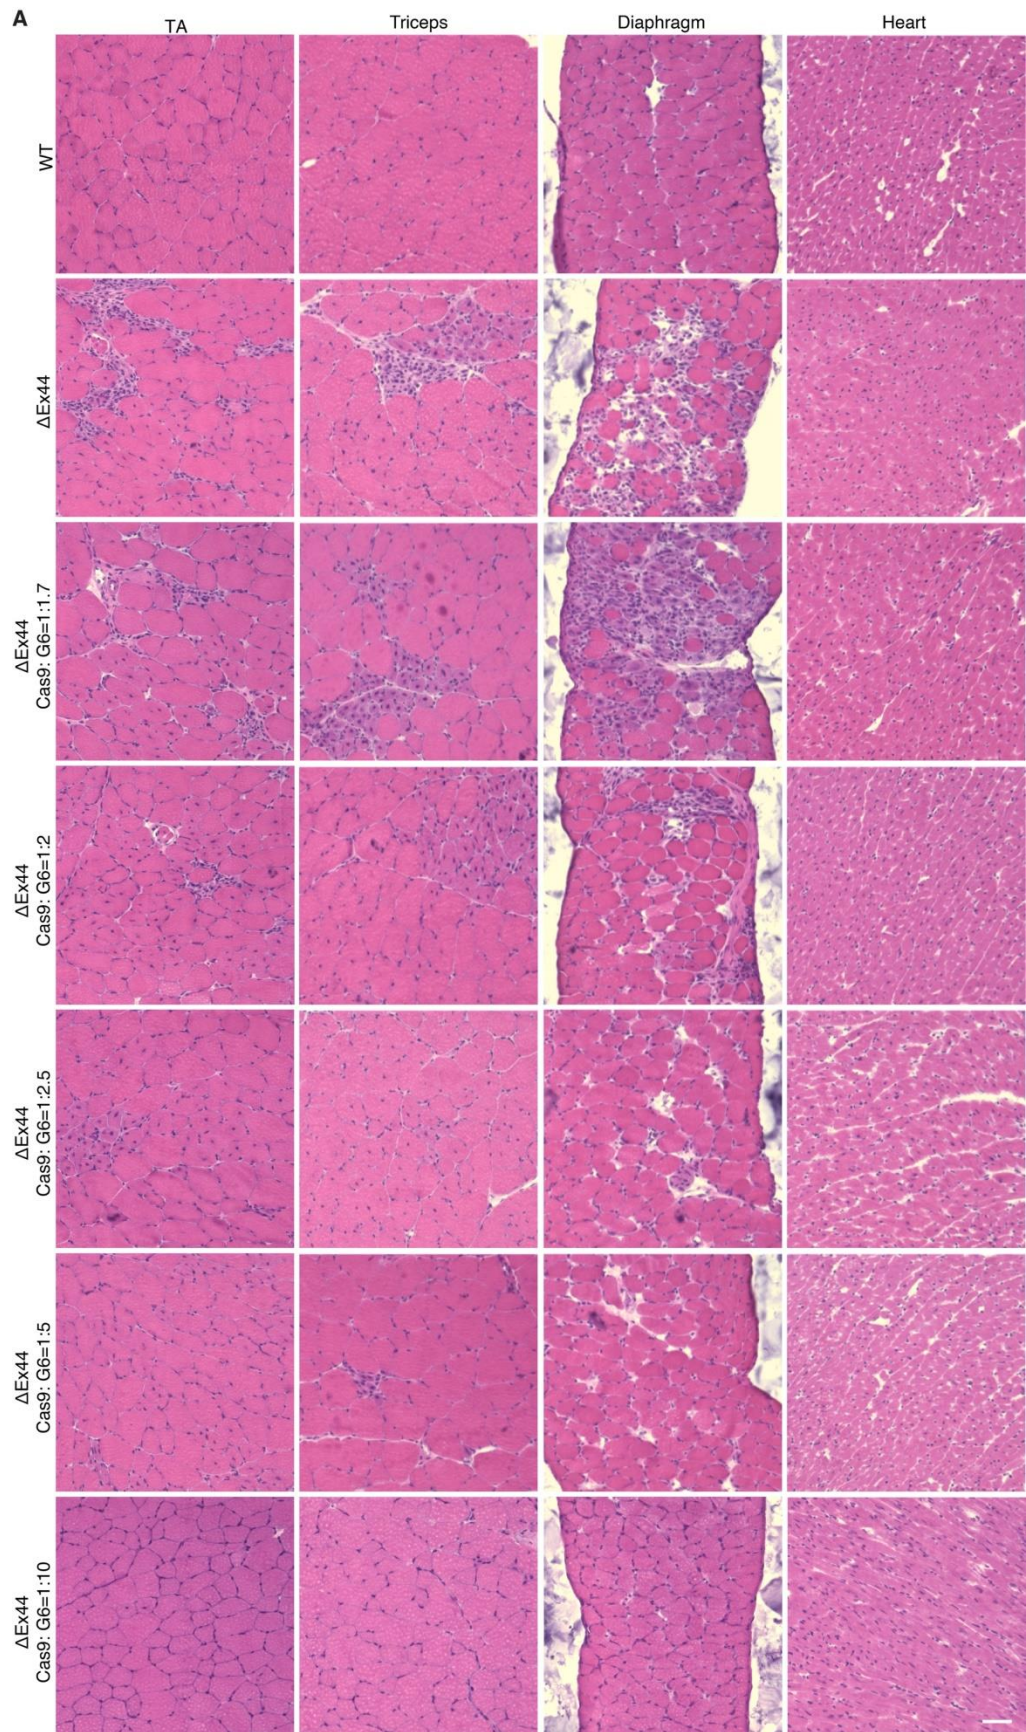



**B**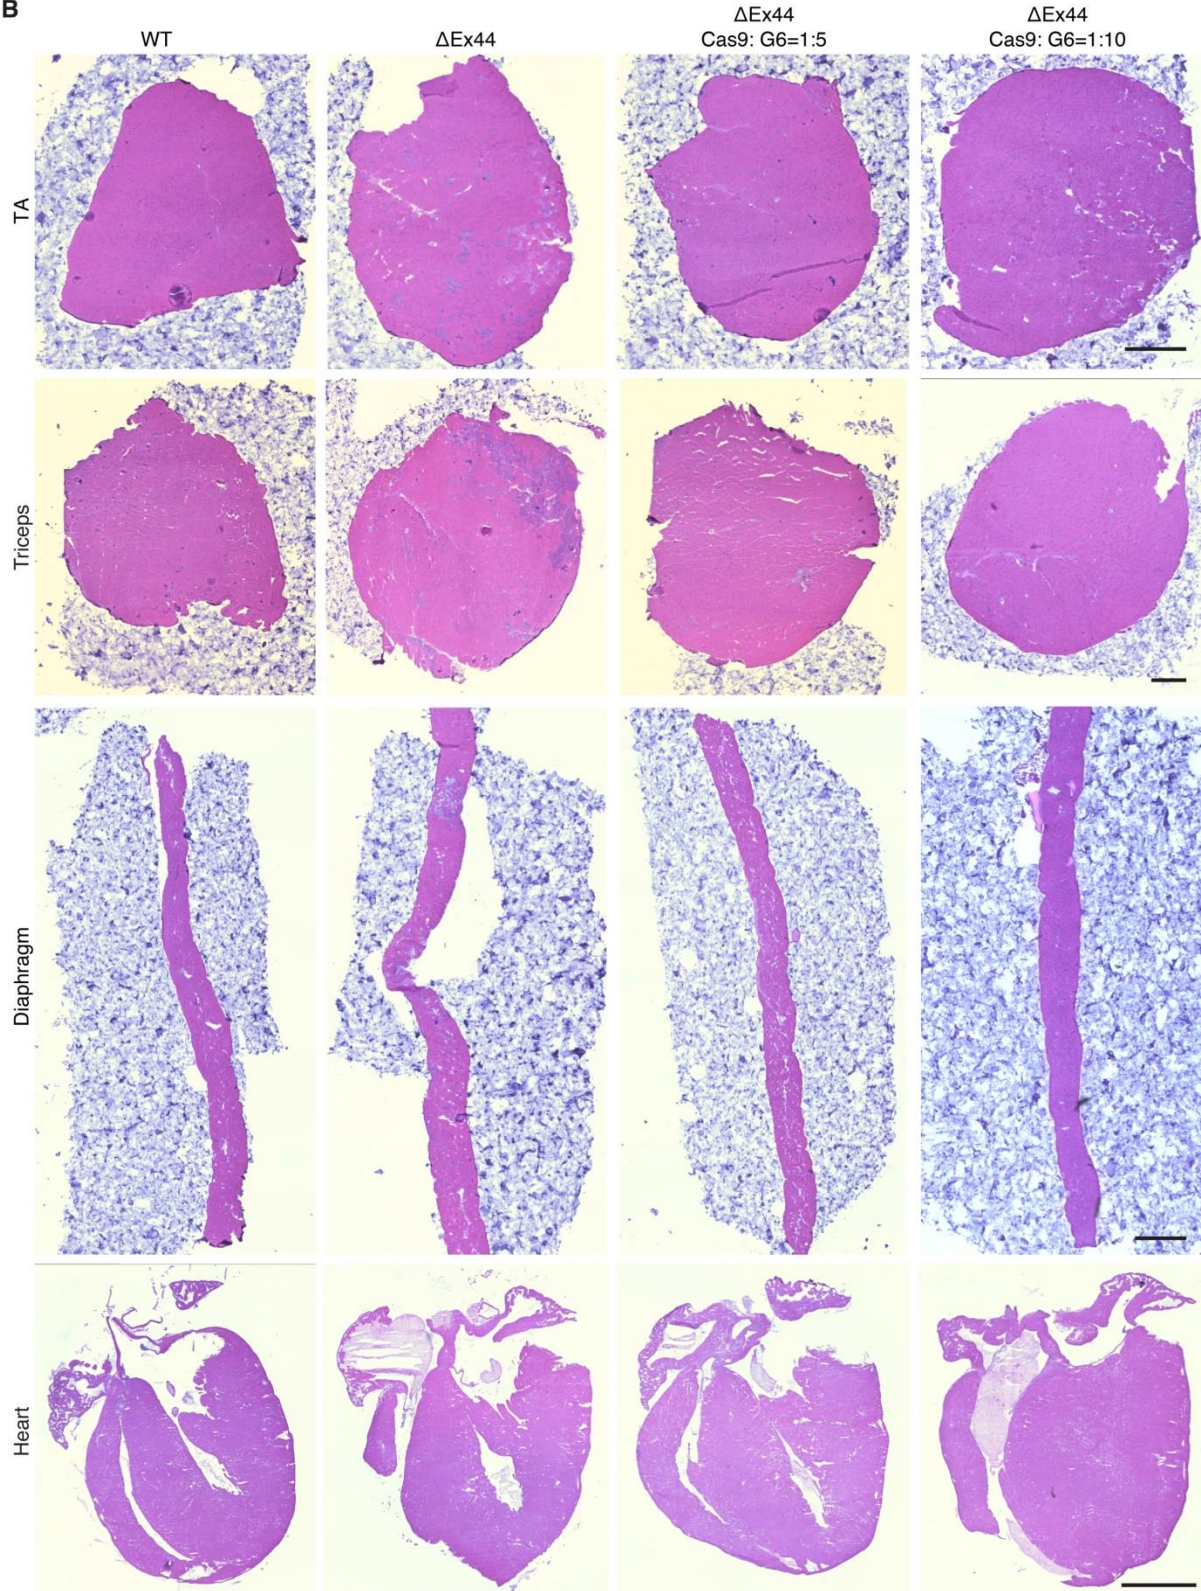



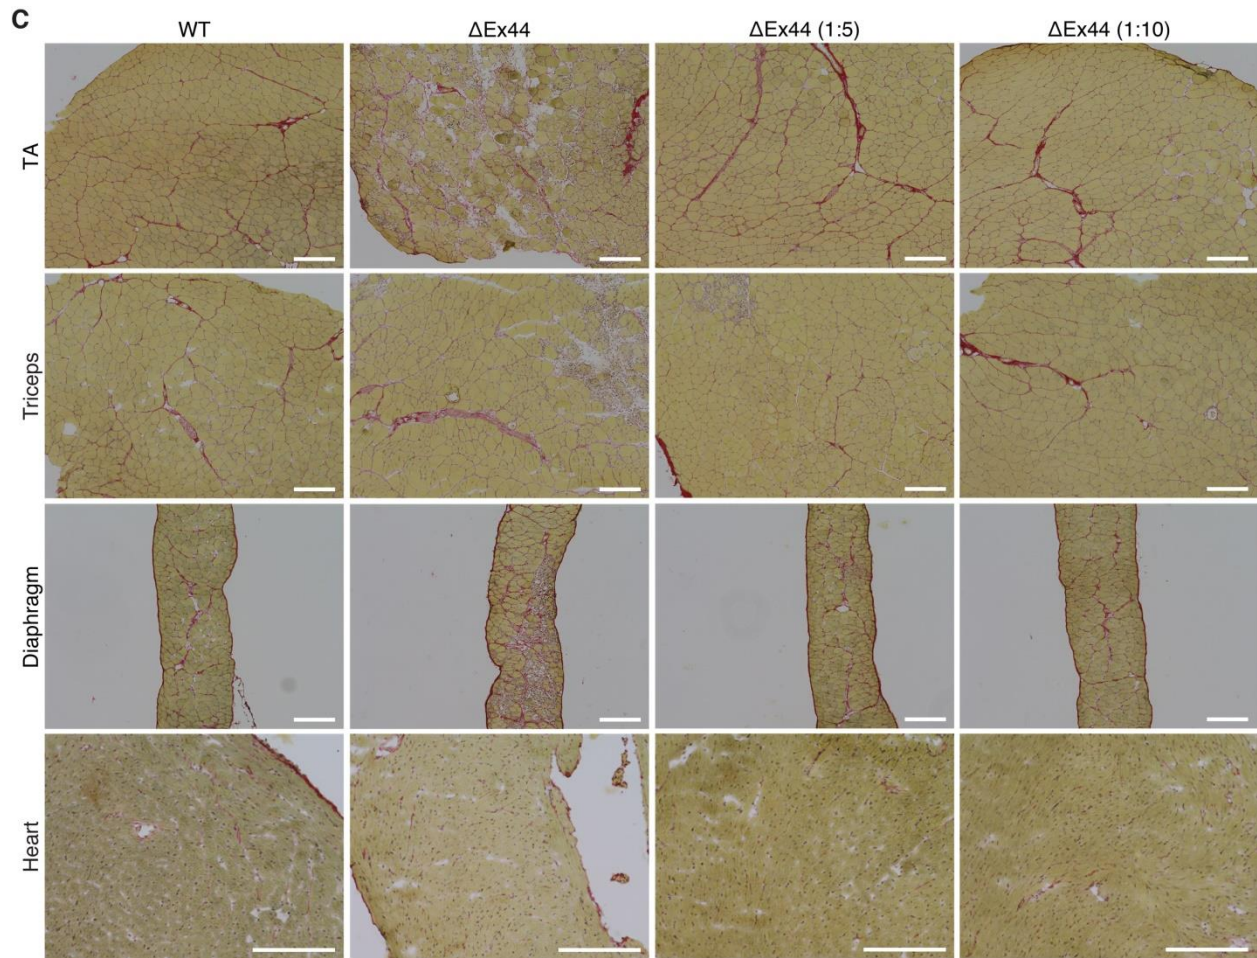

**Fig. S7. Histology of  $\Delta$ Ex44 mice after systemic delivery of AAV9 expressing gene editing components.** (A) H&E staining of TA, triceps, diaphragm and heart of  $\Delta$ Ex44 mice 4 weeks after systemic delivery of AAV-Cas9 and AAV-G6 at the indicated ratios. AAV-Cas9 was administered at  $5 \times 10^{13}$  vg/kg. Scale bar is 50  $\mu$ m. (B) Whole muscle scanning of TA, triceps, diaphragm and heart of corrected  $\Delta$ Ex44 DMD mice. H&E staining of WT,  $\Delta$ Ex44 DMD and corrected  $\Delta$ Ex44 DMD 4 weeks after systemic injection of a 1:5 ratio and 1:10 ratio of AAV-Cas9 to AAV-G6. AAV-Cas9 was administered at  $5 \times 10^{13}$  vg/kg. Tile scan (4X) of the entire muscle. Scale bar in TA, triceps, diaphragm is 500  $\mu$ m, in heart is 1.5mm. (C) Picosirius red staining of TA, triceps, diaphragm and heart of  $\Delta$ Ex44 mice 4 weeks after systemic delivery of AAV-Cas9 and AAV-G6 at the indicated ratios. AAV-Cas9 was administered at  $5 \times 10^{13}$  vg/kg. Scale bar is 50  $\mu$ m.

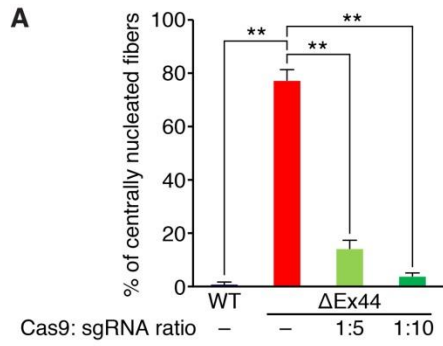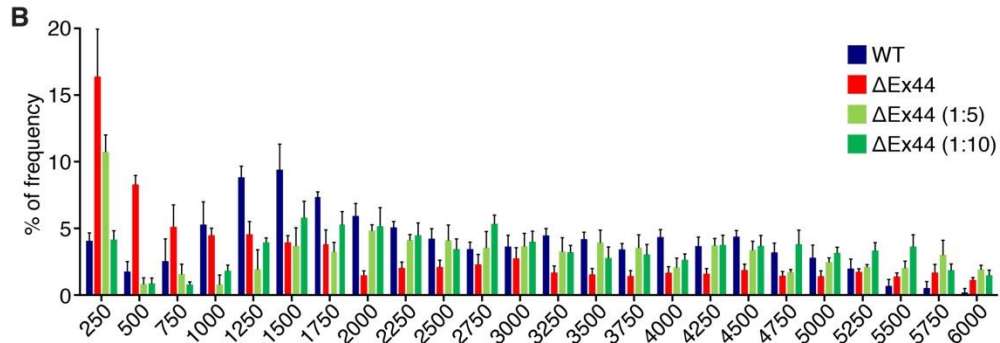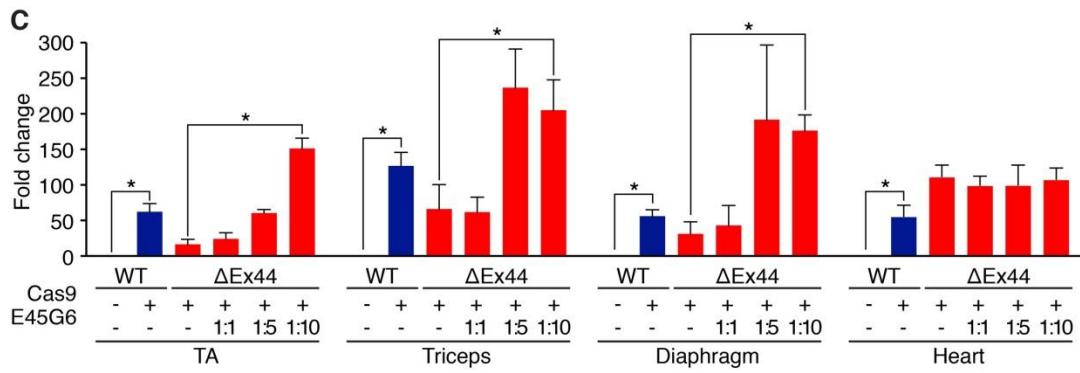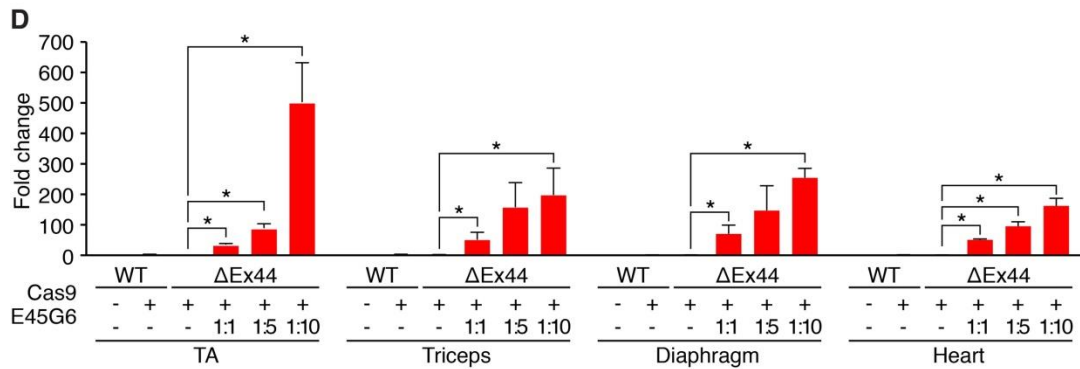

**Fig. S8. Quantification of histological improvement and qPCR analysis of corrected  $\Delta$ Ex44 DMD mice.** (A) Percentage of centrally nucleated fibers in TA muscle of WT,  $\Delta$ Ex44 DMD control and  $\Delta$ Ex44 DMD-AAV9 treated mice 4 weeks after systemic delivery at indicated ratios. Data are represented as mean  $\pm$  SEM. One-way ANOVA was performed followed by Newman-Keuls post hoc test.  $**P < 0.001$  (n=3). (B) Measurement of fiber area of transverse muscle sections. Fiber size is grouped into  $250 \mu\text{m}^2$  intervals, and represented as the percentage of total fibers in each group. Data are represented as mean  $\pm$  SEM. One-way ANOVA was performed followed by Newman-Keuls post hoc test. (n=3). (C) qPCR analysis of Cas9 mRNA expression in TA, triceps, diaphragm, and heart of  $\Delta$ Ex44 mice 4 weeks after systemic delivery of AAV-Cas9 and AAV-G6 at the indicated ratios. AAV-Cas9 was administered at  $5 \times 10^{13}$  vg/kg. Normalized to 18S ribosomal RNA. Data are represented as mean  $\pm$  SEM. One-way ANOVA was performed followed by Newman-Keuls post hoc test.  $*P < 0.005$ . (n= 3). (D) qPCR analysis of GFP mRNA expression in TA, triceps, diaphragm, and heart of  $\Delta$ Ex44 mice 4 weeks after systemic delivery of AAV-Cas9 and AAV-G6 at the indicated ratios. AAV-Cas9 was administered at  $5 \times 10^{13}$  vg/kg. Normalized to 18S ribosomal RNA. Data are represented as mean  $\pm$  SEM. One-way ANOVA was performed followed by Newman-Keuls post hoc test.  $*P < 0.005$ . (n= 3).



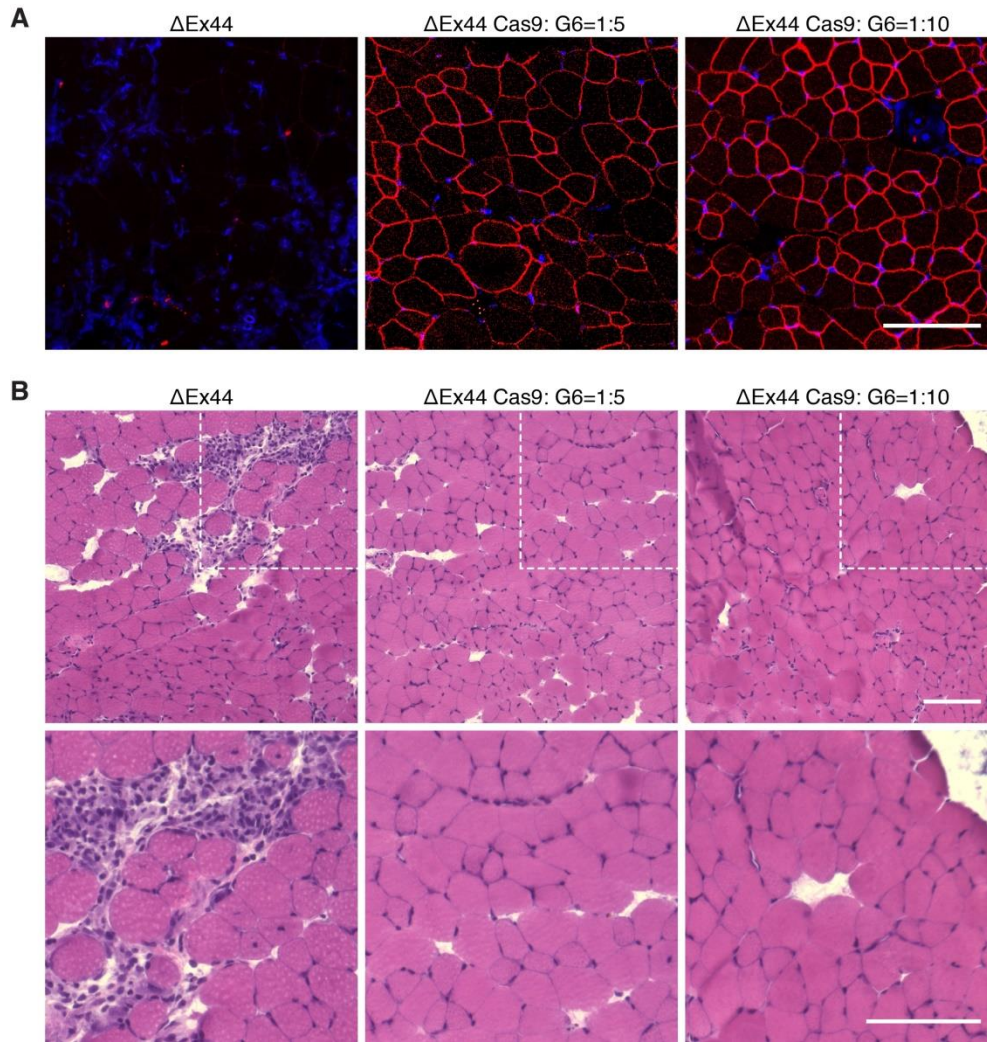

**Fig. S9. Histological analysis showing dystrophin restoration in the EDL muscle of corrected  $\Delta\text{Ex44}$  DMD mice.** (A) Dystrophin immunostaining of EDL muscle in  $\Delta\text{Ex44}$  DMD and corrected  $\Delta\text{Ex44}$  DMD mice 4 weeks after systemic injection of a 1:5 ratio and 1:10 ratio of AAV-Cas9 to AAV-G6. AAV-Cas9 was administered at  $5 \times 10^{13}$  vg/kg. Dystrophin is shown in red. Nuclei are marked by DAPI stain in blue. Scale bar is 100  $\mu\text{m}$ . (B) H&E staining of EDL muscle in  $\Delta\text{Ex44}$  DMD and corrected  $\Delta\text{Ex44}$  DMD mice 4 weeks after systemic injection of a 1:5 ratio and 1:10 ratio of AAV-Cas9 to AAV-G6. AAV-Cas9 was administered at  $5 \times 10^{13}$  vg/kg. Inset box indicates area of magnification shown below. Scale bar is 50  $\mu\text{m}$ .

**Table S1. Primer sequences and media components.**

| Primer sequences for exon targeting and generation of ΔEx44 DMD mouse model |                            |                                               |                                                                                                                         |                                                              |
|-----------------------------------------------------------------------------|----------------------------|-----------------------------------------------|-------------------------------------------------------------------------------------------------------------------------|--------------------------------------------------------------|
| Purpose of the primers                                                      | ID                         | Sequence (5'-3')                              |                                                                                                                         |                                                              |
| Primers for sgRNA targeting exon 43                                         | Ex43-gRNA#1-DMD-Top        | CACCGTTTTAAATTTTATATA                         |                                                                                                                         |                                                              |
|                                                                             | Ex43-gRNA#1-DMD-Bot        | AACTAATATAAAAATTTTAAAC                        |                                                                                                                         |                                                              |
|                                                                             | Ex43-gRNA#2-DMD-Top        | CACCGTTTATATACGAATATA                         |                                                                                                                         |                                                              |
|                                                                             | Ex43-gRNA#2-DMD-Bot        | AACTTATATCTGTAATAAACA                         |                                                                                                                         |                                                              |
|                                                                             | Ex43-gRNA#3-DMD-Top        | CACCGTATGTTACTACCTTGT                         |                                                                                                                         |                                                              |
|                                                                             | Ex43-gRNA#3-DMD-Bot        | AAACACAGGGTAGTAAACATAC                        |                                                                                                                         |                                                              |
|                                                                             | Ex43-gRNA#4-DMD-Top        | CACCGTACAGGACCCAGAGGGT                        |                                                                                                                         |                                                              |
|                                                                             | Ex43-gRNA#4-DMD-Bot        | AAACACCGCTTGTCCGCTTGTAC                       |                                                                                                                         |                                                              |
| Primers for sgRNA targeting exon 45                                         | Ex45-gRNA#5-Top            | CACCGCGCTGCCAATGCCATCTG                       |                                                                                                                         |                                                              |
|                                                                             | Ex45-gRNA#5-Bot            | AAACCGGATGGCATTGGCGAGCG                       |                                                                                                                         |                                                              |
|                                                                             | Ex45-gRNA#6-Top            | CACCGCTTACAGGACTCCAGGA                        |                                                                                                                         |                                                              |
|                                                                             | Ex45-gRNA#6-Bot            | AAACTCTGGAGTTCCTGTAAGC                        |                                                                                                                         |                                                              |
|                                                                             | Ex45-gRNA#7-Top            | CACCGAGAACTCCAGATGGCATT                       |                                                                                                                         |                                                              |
|                                                                             | Ex45-gRNA#7-Bot            | AAACAATGCCATCTGGAGTCTCTC                      |                                                                                                                         |                                                              |
|                                                                             | Ex45-gRNA#8-Top            | CACCGCGCTGCCAATGCCATCTC                       |                                                                                                                         |                                                              |
|                                                                             | Ex45-gRNA#8-Bot            | AAACCGATGGCATTGGCGAGCG                        |                                                                                                                         |                                                              |
| Primers for T7E1 assay                                                      | mDmd-T7E1-Ex45-F           | CTAACAATAAAGGTGCTTTCTATC                      |                                                                                                                         |                                                              |
|                                                                             | mDmd-T7E1-Ex45-R           | GGCAATCCCTCATGATTTTAGCAC                      |                                                                                                                         |                                                              |
|                                                                             | DMD-T7E1-Ex45-F            | GCTTTCTGCTTGTATCCCTTGG                        |                                                                                                                         |                                                              |
|                                                                             | DMD-T7E1-Ex45-R            | AATGTTAGTGCCTTCACCC                           |                                                                                                                         |                                                              |
| Primers for sgRNA targeting Dmd exon 44 to generate the ΔEx44 DMD model     | mDmd-In44-2-Top            | CACCGGTAGTCTGAATCAGGAGGA                      |                                                                                                                         |                                                              |
|                                                                             | mDmd-In44-2-Bot            | AAACTCCTCCTGATTCAGAATACC                      |                                                                                                                         |                                                              |
|                                                                             | mDmd-In44-6-Top            | CACCGTATGTTGACACCGTCCAGA                      |                                                                                                                         |                                                              |
|                                                                             | mDmd-In44-6-Bot            | AAACTTGGACTGGTCCACATAC                        |                                                                                                                         |                                                              |
| Primers for in vitro transcription of sgRNA                                 | Exon 44_T7-In44-2-F        | GAATTGTAATACGACTCACTATAGGGTAGTCTGAATCAGGAGGA  |                                                                                                                         |                                                              |
|                                                                             | Exon 44_T7-In44-6-F        | GAATTGTAATACGACTCACTATAGGGTAGTCTGGAACCGTCCAGA |                                                                                                                         |                                                              |
|                                                                             | Exon 44_T7-Rv              | AAAGCACCAGCTCCGTCGCAC                         |                                                                                                                         |                                                              |
| Primers for genotyping of ΔEx44 DMD model                                   | Geno dE44-F                | GCTGAGGGGAGACAGTAGA                           |                                                                                                                         |                                                              |
|                                                                             | Geno dE44-R                | TCAGAAAGCATTTTGTCAAT                          |                                                                                                                         |                                                              |
| Media for iPSC-CMs differentiation                                          |                            |                                               |                                                                                                                         |                                                              |
| Media name                                                                  | Volume of base media       | Base media                                    | Supplement                                                                                                              |                                                              |
| CDM3                                                                        | 500mL                      | RPMI-1640 (Gibco 11875-093)                   | CDM3 Supplement:<br>- 4.224g L-ascorbic acid-2-phosphate<br>- 10g recombinant human albumin<br>- 200mL H <sub>2</sub> O |                                                              |
| CDM3-C                                                                      | 100mL                      | CDM3                                          | 33.3, 41.6, or 50 μL 4, 5, or 6 μM CHIR99021-HCl (12mM).                                                                |                                                              |
| CDM3-WNT                                                                    | 100mL                      | CDM3                                          | 20 μL 2 uM WNT-C59 (10mM)                                                                                               |                                                              |
| SELECTIVE                                                                   | 500mL                      | RPMI-1640 -glucose (Gibco 11879-020)          | 10mL B27 Supplement (Thermo Fisher Scientific 17504044)                                                                 |                                                              |
| BASAL                                                                       | 500mL                      | RPMI-1640 (Gibco 11875-093)                   | 10mL B27 Supplement (Thermo Fisher Scientific 17504044)                                                                 |                                                              |
| Sequence of primers to titer AAV                                            |                            |                                               |                                                                                                                         |                                                              |
| Primers for titring of AAV-Trispr                                           | CO388-GFP-F                | AGAAGCGCATCAAGGTGAAC                          |                                                                                                                         |                                                              |
|                                                                             | CO389-GFP-R                | GAATCCAGCAGGACCATGT                           |                                                                                                                         |                                                              |
| Primers for titring of AAV-CK8e-Cas9                                        | CO460-spCas9-F             | CGGCTTCAAGAGACAGC                             |                                                                                                                         |                                                              |
|                                                                             | CO461-spCas9-R             | TTCACTCCCGATCAGCTT                            |                                                                                                                         |                                                              |
| Sequence of primers for on and off target genomic amplicon deep sequencing. |                            |                                               |                                                                                                                         |                                                              |
| Sites                                                                       | ID                         | Sequence (5'->3)                              | Product (bps)                                                                                                           | miSeq-with Adaptor                                           |
| E45G6 Target                                                                | mDmd-Ex45G6-ontarget-DS-F1 | CCCTGAGCTGAAGTGAGAGG                          | 404                                                                                                                     | TCGTCGGCAGCTCAGATGTGATAAAGAGACAGCCCTGAGTCAAGTGAGAGG          |
|                                                                             | mDmd-Ex45G6-ontarget-DS-R2 | ACCTCTTCTCCTTTCTGCCAG                         |                                                                                                                         | GTCTCGTGGGCTCGGAGATGTGATAAAGAGACAGCTCTTCTCCTTTCTGCCAG        |
| E45G6 OT1                                                                   | E45G6OT1-DS-F1-YLM         | CTGCCCAACAAGAGCATCTTAAG                       | 374                                                                                                                     | TCGTCGGCAGCTCAGATGTGATAAAGAGACAGCTGCCCAACAAGAGCATCTTAAG      |
|                                                                             | E45G6OT1-DS-R1-YLM         | AGCCACTGTTAACTTGCAGTCAAC                      |                                                                                                                         | GTCTCGTGGGCTCGGAGATGTGATAAAGAGACAGGCCACTGTTAACTTGCAGTCAAC    |
| E45G6 OT2                                                                   | E45G6OT2-DS-F1-YLM         | CTTCTCCTCCACCTCCAGAC                          | 356                                                                                                                     | TCGTCGGCAGCTCAGATGTGATAAAGAGACAGCTTCTCCTCCACCTCCAGAC         |
|                                                                             | E45G6OT2-DS-R1-YLM         | TCCTGTTACATGCCCCGACAC                         |                                                                                                                         | GTCTCGTGGGCTCGGAGATGTGATAAAGAGACAGCTCTTACATGCCCCGACAC        |
| E45G6 OT3                                                                   | E45G6OT3-DS-F1-YLM         | CTCAGAGAGTGTGATGGACTCCTG                      | 442                                                                                                                     | TCGTCGGCAGCTCAGATGTGATAAAGAGACAGCTCAGAGAGTGTGATGGACTCCTG     |
|                                                                             | E45G6OT3-DS-R1-YLM         | TCCATGTTGGTCAATTTCTGCACA                      |                                                                                                                         | GTCTCGTGGGCTCGGAGATGTGATAAAGAGACAGCTTCAATGTTGGTCAATTTCTGCACA |
| E45G6 OT4                                                                   | E45G6OT4-DS-F1-YLM         | GGTCTCAAATGCCTGTTGTGA                         | 487                                                                                                                     | TCGTCGGCAGCTCAGATGTGATAAAGAGACAGGTTCTCAAATGCCTGTTGTGA        |
|                                                                             | E45G6OT4-DS-R1-YLM         | TCTCTGGAGGGTGAAGAAAG                          |                                                                                                                         | GTCTCGTGGGCTCGGAGATGTGATAAAGAGACAGTCTCTGGAGGGTGAAGAAAG       |
| E45G6 OT5                                                                   | E45G6OT5-DS-F1-YLM         | TGTGGACTGCTAGAAAATTTGGA                       | 440                                                                                                                     | TCGTCGGCAGCTCAGATGTGATAAAGAGACAGTGTGGACTGCTAGAAAATTTGGA      |
|                                                                             | E45G6OT5-DS-R2-YLM         | GATCCCGCTGGAGTTATTAGT                         |                                                                                                                         | GTCTCGTGGGCTCGGAGATGTGATAAAGAGACAGATCCCGCTGGAGTTATTAGT       |
| E45G6 OT6                                                                   | E45G6OT6-DS-F2-YLM         | TGGACAAGAGAGCAACAAGAGCT                       | 413                                                                                                                     | TCGTCGGCAGCTCAGATGTGATAAAGAGACAGTGGACAAGAGAGCAACAAGAGCT      |
|                                                                             | E45G6OT6-DS-R2-YLM         | TTTATGACAGTTGAGGTGCCAGA                       |                                                                                                                         | GTCTCGTGGGCTCGGAGATGTGATAAAGAGACAGTTTATGACAGTTGAGGTGCCAGA    |
| E45G6 OT7                                                                   | E45G6OT7-DS-F1-YLM         | AAGGACAGCTCAAAGACTCTT                         | 398                                                                                                                     | TCGTCGGCAGCTCAGATGTGATAAAGAGACAGAGGACAGCTCAAAGACTCTT         |
|                                                                             | E45G6OT7-DS-R1-YLM         | ACTTCAAACGCACTGTCAATCAG                       |                                                                                                                         | GTCTCGTGGGCTCGGAGATGTGATAAAGAGACAGACTTCAAACGCACTGTCAATCAG    |
| E45G6 OT8                                                                   | E45G6OT8-DS-F1-YLM         | TCTGAAGAAGCCCTTGGTCAATCA                      | 459                                                                                                                     | TCGTCGGCAGCTCAGATGTGATAAAGAGACAGTCTGAAGAAGCCCTTGGTCAATCA     |
|                                                                             | E45G6OT8-DS-R1-YLM         | ATCCTCTACAGTAAAGAGAGGCC                       |                                                                                                                         | GTCTCGTGGGCTCGGAGATGTGATAAAGAGACAGATCCTCTACAGTAAAGAGAGGCC    |
| E45G6 OT9                                                                   | E45G6OT9-DS-F1-YLM         | GAAGGCAGTCAAGCAGATTGGATC                      | 414                                                                                                                     | TCGTCGGCAGCTCAGATGTGATAAAGAGACAGGAAGGCAGTCAAGCAGATTGGATC     |
|                                                                             | E45G6OT9-DS-R2-YLM         | ACTAGCAGCTTTGGATGAAGACA                       |                                                                                                                         | GTCTCGTGGGCTCGGAGATGTGATAAAGAGACAGACTAGCAGCTTTGGATGAAGACA    |
| E45G6 OT10                                                                  | E45G6OT10-DS-F2-YLM        | ATGACGACAGCAGCAATGTTGATG                      | 445                                                                                                                     | TCGTCGGCAGCTCAGATGTGATAAAGAGACAGTATGACGACAGCAGCAATGTTGATG    |
|                                                                             | E45G6OT10-DS-R2-YLM        | CCTCAAAGCTCTCTGAGGAAGC                        |                                                                                                                         | GTCTCGTGGGCTCGGAGATGTGATAAAGAGACAGCCTCAAAGCTCTCTGAGGAAGC     |
| Sequence of primers for on target cDNA amplicon deep sequencing             |                            |                                               |                                                                                                                         |                                                              |
| RT-Site                                                                     | ID                         | Sequence (5'->3)                              | Product (bps)                                                                                                           | miSeq-with Adaptor                                           |
| E45G6 RT-DS                                                                 | mDmd-E4346-RT-DS-F1        | AGGTGAAGTACAGAAAGCCGT                         | 370                                                                                                                     | TCGTCGGCAGCTCAGATGTGATAAAGAGACAGAGGTGAAGTACAGAAAGCCGT        |
|                                                                             | mDmd-E4346-RT-DS-R1        | CTGCTGCTCATCTCCAAGTGGG                        |                                                                                                                         | GTCTCGTGGGCTCGGAGATGTGATAAAGAGACAGCTGCTGCTCATCTCCAAGTGGG     |
